# Supplementary material
Source: MDPI journal article supplement (https://www.mdpi.com/2073-4395/10/1/69)
Supplement: s1 [file s1]

## Sheet: Costs
		Open storage manure (T facility)
		Item	Description	Unit	Freq	Unit cost	Total cost (UGX)	Total Cost (USD)
		Iron sheet (floor)	Floor bed Lining	pcs	3	25000	75000	20.4638
		transport of material			1	15000	15000	4.09277
		Investment cost					90000	24.5566
		Loading of manure		Lump sum	2	15000	30000	8.18554
		Transport of manure to site		trip	2	15000	30000	8.18554
		Maize production costs for a hactare			2	1812000	3624000	988.813
		Cleaning the facility			2	5000	10000	2.72851
		O and M costs					3694000	1007.91
		Benefits from maize sale			2	3000000	6000000	1637.11
		Net cash flow					2306000	629.195
								0
		Under shade storage (M facility)
		Iron sheet (Roof)	Roofing	pcs	4	25000	100000	27.2851
		Iron sheet (Floor)	Floor bed Lining	pcs	3	25000	75000	20.4638
		Poles	Treated, 10 ft	pcs	6	15000	90000	24.5566
		Eucalyptus poles	Wall strength and roof	pcs	20	3000	60000	16.3711
		Roofing nails		kg	2	7500	15000	4.09277
		Wire nails	6 inch	kg	1	5500	5500	1.50068
		Wire nails	5 inch	kg	1	5500	5500	1.50068
		transport of materials			1	15000	15000	4.09277
		Labour			1	50000	50000	13.6426
		investment cost					416000	113.506
		loading of manure		Lump sum	2	15000	30000	8.18554
		Transport of manure of site		trip	2	15000	30000	8.18554
		cleaning of facility			2	5000	10000	2.72851
		Maize production costs for a hactare			2	1812000	3624000	988.813
		O andM					3694000	1007.91
		Benefits from maize sales			2	2865000	5730000	1563.44
		Net cash flow					2036000	555.525
								0
		Biogas digester (S facility)
		Iron sheet (Roof)	Roofing	pcs	4	25000	100000	27.2851
		Fixed dome bio-digester	Bricks, aggregate, Lake sand, plaster sand, cement, cooking stove and lighting system, labour for installation	pcs	1	6500000	6500000	1773.53
		Poles	Treated, 10 ft	pcs	6	15000	90000	24.5566
		Roofing nails		kg	2	7500	15000	4.09277
		Wire nails	6 inch	kg	1	5500	5500	1.50068
		Wire nails	5 inch	kg	1	5500	5500	1.50068
		transport of material			1	15000	15000	4.09277
		Excavation of pit			1	200000	200000	54.5703
		Labour			1	50000	50000	13.6426
		Investment					6981000	1904.77
		Mixing of manure		days	20	2500	50000	13.6426
		cleaning of facility			4	5000	20000	5.45703
		Water for mixing		litres	3220	10	32200	8.78581
		Maize production costs for a hactare			2	1812000	3624000	988.813
		O and M					3726200	1016.7
		Expenditure of charcoal before biogas installation	charcoal for 1000 per day	days	365	1000	365000	99.5907
		Expenditure of charcoal after biogas installation	charcoal for 1000 per day of not enough gas	days	48	1000	48000	13.0969
		Annual benefits from gas					317000	86.4939
		Benefits from maize sales			2	3277500	6555000	1788.54
		Annual benefits					6872000	1875.03
		Net cash flow					3145800	858.336
								0
		Vermicomposting system (V facility)
		Timber	for making the pallets	pcs	20	12000	240000	65.4843
		netting	for limiting rodents	meters	9	8000	72000	19.6453
		transportation of material			1	39000	39000	10.6412
		Labour for construction			1	200000	200000	54.5703
		investment cost					551000	150.341
		Taking care of vermicomposting system	For proper management of units	weeks	40	15000	600000	163.711
		Initial earthworm stock		kg	3	70000	210000	57.2988
		Water for system management		litres	399	10	3990	1.08868
		Maize production costs for a hactare			2	1812000	3624000	988.813
		O and M					4437990	1210.91
		Benefits from harvested earthworms		kg	90	70000	6300000	1718.96
		benefits from maize sale			2	3292500	6585000	1796.73
		Annual benefits					12885000	3515.69
		Net cash flow					8447010	2304.78
								0
		Inorganic fertilizer DAP (D)
		Purchase of fertilizer		100 kg bags	2	340000	680000	185.539
		Investment					680000	185.539
		Maize production costs for a hactare			2	1812000	3624000	988.813
		O and M					3624000	988.813
		benefits from maize sales			2	3397500	6795000	1854.02
		Net cash flow					3171000	865.211
								0
		No fertilizer treatment (C)
		Maize production costs for a hactare			2	1812000	3624000	988.813
		O and M					3624000	988.813
		benefits from maize sales			2	2130000	4260000	1162.35
		Net cash flow					636000	173.533

## Sheet: NPV and IRR
					T	M	S	V	D	C		0.05	0.1	0.139	0.24
				0	-90000	-416000	-6981000	-551000	-680000	0	-24.5566	-113.506	-1904.77	-150.341	-185.539	0
				1	2306000	2036000	3145800	8447010	3171000	636000	629.195	555.525	858.336	2304.78	865.211	173.533
				2	2306000	2036000	3145800	8447010	3171000	636000	629.195	555.525	858.336	2304.78	865.211	173.533
				3	2306000	2036000	3145800	8447010	3171000	636000	629.195	555.525	858.336	2304.78	865.211	173.533
				4	2306000	2036000	3145800	8447010	3171000	636000	629.195	555.525	858.336	2304.78	865.211	173.533
				5	2306000	2036000	3145800	8447010	3171000	636000	629.195	555.525	858.336	2304.78	865.211	173.533
				6	2306000	2036000	3145800	8447010	3171000	636000	629.195	555.525	858.336	2304.78	865.211	173.533
				7	2306000	2036000	3145800	8447010	3171000	636000	629.195	555.525	858.336	2304.78	865.211	173.533
				8	2306000	2036000	3145800	8447010	3171000	636000	629.195	555.525	858.336	2304.78	865.211	173.533
				9	2306000	2036000	3145800	8447010	3171000	636000	629.195	555.525	858.336	2304.78	865.211	173.533
				10	2306000	2036000	3145800	8447010	3171000	636000	629.195	555.525	858.336	2304.78	865.211	173.533
				11	2306000	2036000	3145800	8447010	3171000	636000	629.195	555.525	858.336	2304.78	865.211	173.533
				12	2306000	2036000	3145800	8447010	3171000	636000	629.195	555.525	858.336	2304.78	865.211	173.533
				13	2306000	2036000	3145800	8447010	3171000	636000	629.195	555.525	858.336	2304.78	865.211	173.533
				14	2306000	2036000	3145800	8447010	3171000	636000	629.195	555.525	858.336	2304.78	865.211	173.533
				15	2306000	2036000	3145800	8447010	3171000	636000	629.195	555.525	858.336	2304.78	865.211	173.533
				16	2306000	2036000	3145800	8447010	3171000	636000	629.195	555.525	858.336	2304.78	865.211	173.533
				17	2306000	2036000	3145800	8447010	3171000	636000	629.195	555.525	858.336	2304.78	865.211	173.533
				18	2306000	2036000	3145800	8447010	3171000	636000	629.195	555.525	858.336	2304.78	865.211	173.533
				19	2306000	2036000	3145800	8447010	3171000	636000	629.195	555.525	858.336	2304.78	865.211	173.533
				20	2306000	2036000	3145800	8447010	3171000	636000	629.195	555.525	858.336	2304.78	865.211	173.533
				IRR	25.6222	4.89423	0.450357	15.3303	4.66324	#NUM!
				NPV(5%)	2.86479e+07	2.49571e+07	3.22226e+07	1.04717e+08	3.88377e+07	7.92597e+06	7816.6	6809.57	8791.98	28572.3	10596.9	2162.61
				NPV(10%)	1.95423e+07	1.69176e+07	1.9801e+07	7.13632e+07	2.63165e+07	5.41463e+06	5332.14	4615.99	5402.72	19471.5	7180.49	1477.39
				NPV (13.9%)	1.52714e+07	1.31468e+07	1.39748e+07	5.57188e+07	2.04436e+07	4.23672e+06	4166.83	3587.13	3813.04	15203	5578.08	1155.99
				NPV(24%)	9.38825e+06	7.95248e+06	5.94905e+06	3.41684e+07	1.23536e+07	2.61412e+06	2561.6	2169.85	1623.2	9322.89	3370.7	713.267
